# Supplementary material for: Encapsulated Whole Bone Marrow Cells Improve Survival in Wistar Rats after 90% Partial Hepatectomy
Source: Hindawi journal article supplement (doi:10.1155/2016/4831524), 2015-11-16

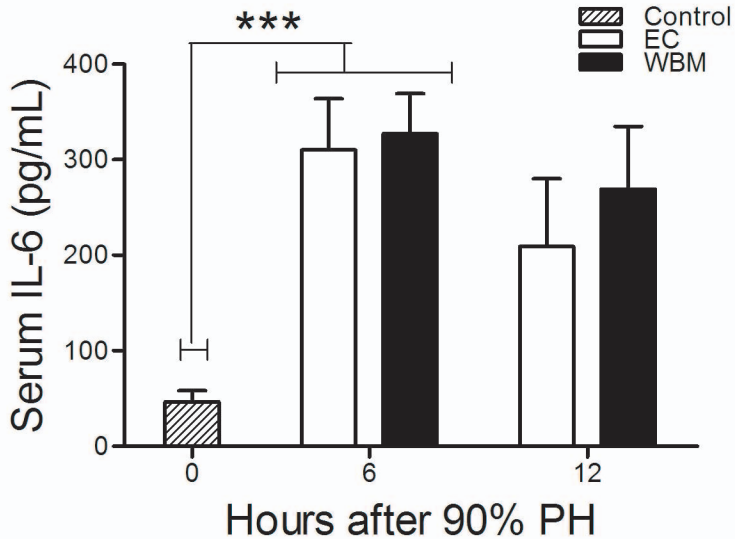

Supplement: f1 [file 4831524.f1.pdf]
